# Supplementary material for: Structural basis of tRNAPro acceptor stem recognition by a bacterial trans-editing domain
Source: PubMed Central journal article supplement (PMC10164551; doi:10.1093/nar/gkad192), 2023-03-23
Supplement: gkad192_supplemental_file.pdf [file gkad192_supplemental_file.pdf]

## Supplementary Information for

### Structural basis of tRNA<sup>Pro</sup> acceptor stem recognition by a bacterial *trans*-editing domain

Xiao Ma<sup>1</sup>, Marina Bakhtina<sup>1</sup>, Irina Shugina<sup>1</sup>, William A. Cantara<sup>1</sup>, Alexandra B. Kuzmishin Nagy<sup>1</sup>, Yuki Goto<sup>2</sup>, Hiroaki Suga<sup>2</sup>, Mark P. Foster<sup>1,\*</sup>, and Karin Musier-Forsyth<sup>1,\*</sup>

<sup>1</sup> Department of Chemistry and Biochemistry and Center for RNA Biology, Ohio State University, Columbus, OH 43210, USA

<sup>2</sup> Department of Chemistry, Graduate School of Science, University of Tokyo, Bunkyo, Tokyo 113-0033, Japan

\* To whom correspondence should be addressed. Tel: +1 614 292 2021; Fax: +1 614-688-5402; Email: musier-forsyth.1@osu.edu.

Correspondence may also be addressed to Mark P. Foster. Tel: +1 614 292 1377; Fax: +1 614 292 6773; Email: foster.281@osu.edu

#### **This PDF file includes:**

Supplementary Figure S1 to S4

Supplementary Table 1 to 3

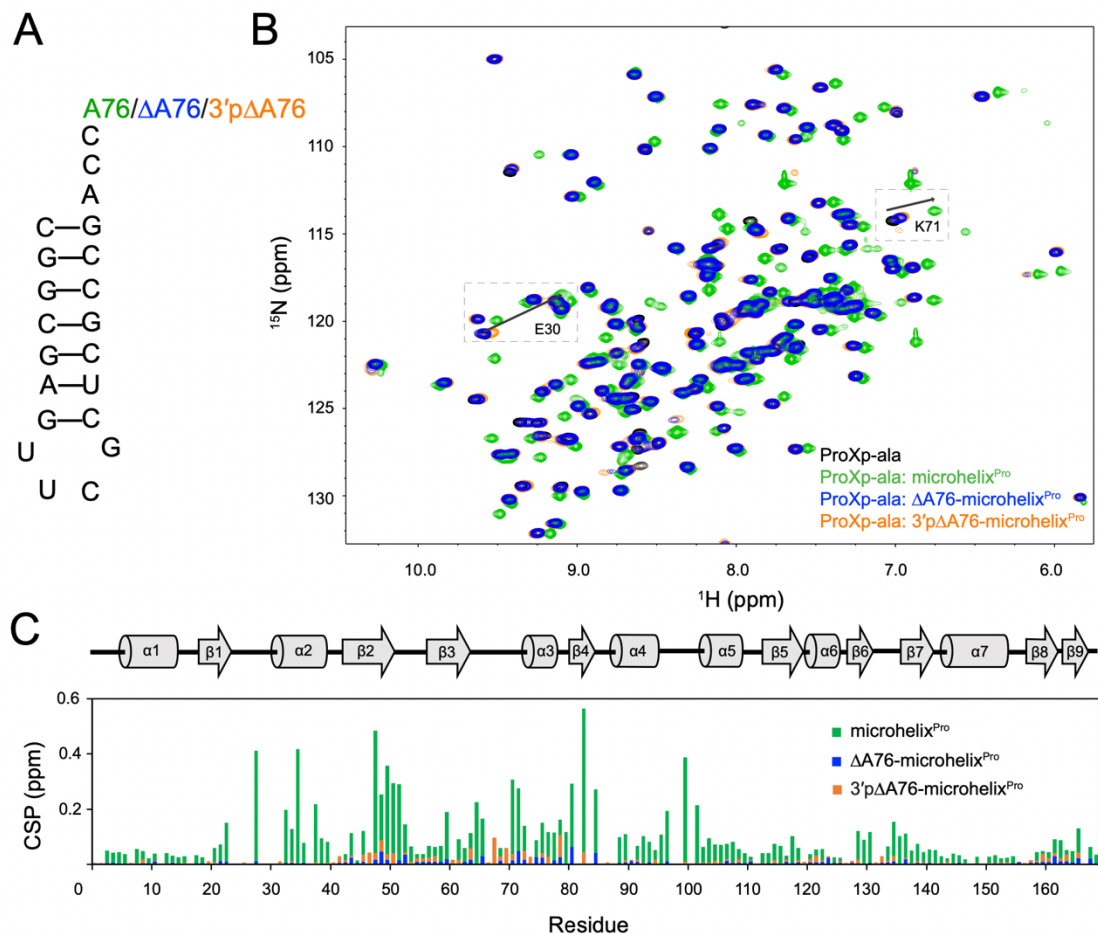

Supplementary Figure S1. Robust binding of tRNA<sup>Pro</sup> ProXp-ala requires the 3'-A76 nucleotide. (A) Secondary structure of microhelix<sup>Pro</sup> (green),  $\Delta$ A76-microhelix<sup>Pro</sup> (blue), and 3'p $\Delta$ A76-microhelix<sup>Pro</sup> (orange). (B) Overlaid <sup>1</sup>H-<sup>15</sup>N HSQC spectra of [U-<sup>15</sup>N]-ProXp-ala alone (black) and in the presence of microhelix<sup>Pro</sup> (green),  $\Delta$ A76-microhelix<sup>Pro</sup> (blue), or 3'p $\Delta$ A76-microhelix<sup>Pro</sup> (orange); Boxes with dotted lines indicate spectral expansions in Figure 5B. (C) Secondary structure of Cc ProXp-ala (top) and summary of per residue CSPs induced in ProXp-ala by microhelix<sup>Pro</sup> (green),  $\Delta$ A76-microhelix<sup>Pro</sup> (blue), and 3'p $\Delta$ A76-microhelix<sup>Pro</sup> (orange).

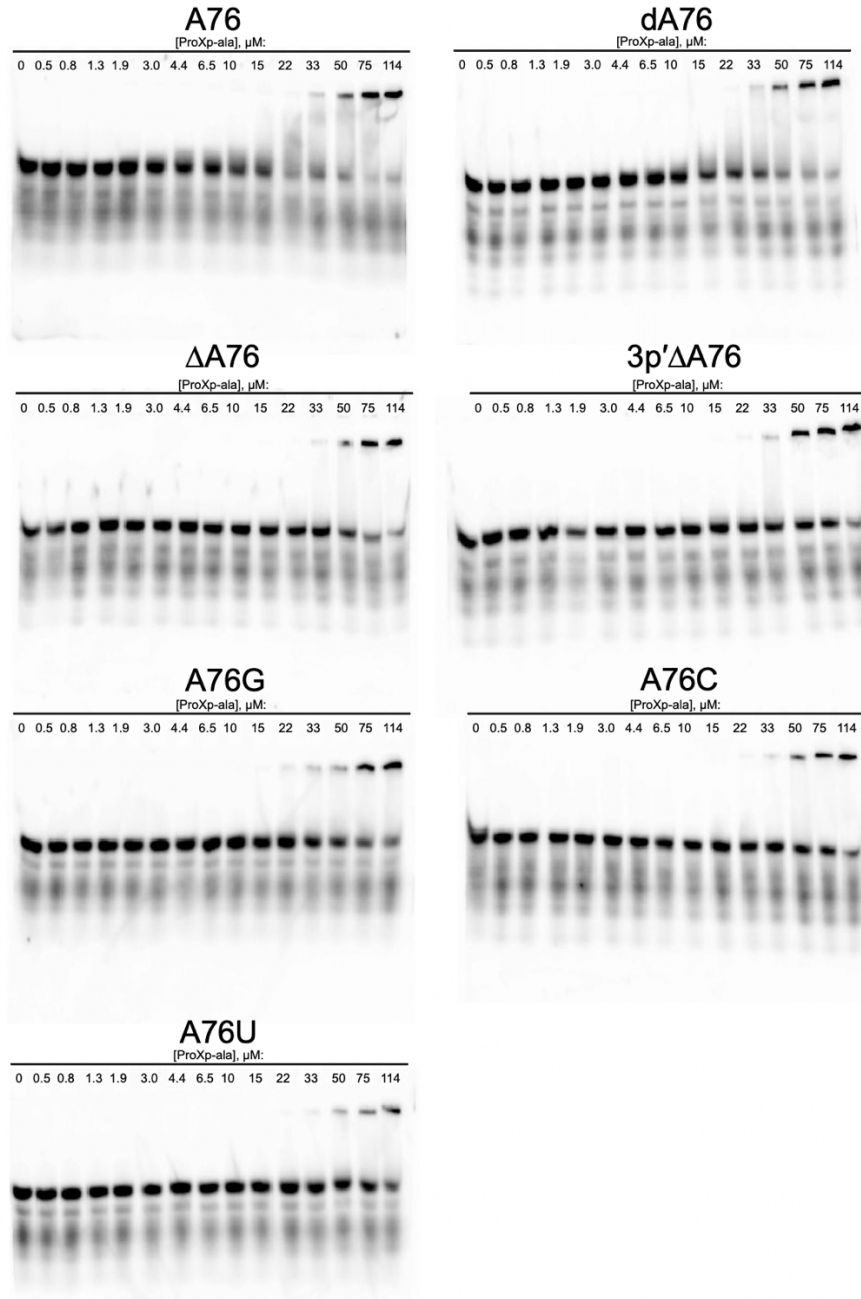

Supplementary Figure S2. Representative EMSA gels for the indicated duplex<sup>Pro</sup> variants corresponding to data in Figure 5 and Table 1. In each case, 81 nM annealed RNA duplex was incubated with different amounts (0-114 μM) of ProXp-ala for 1 h before analysis on 16% native polyacrylamide gels. Due to the smeared bands, the complex formation was calculated from the disappearance of the free RNA,  $[1 - (\text{Free}/\text{Total RNA})]$ . Apparent equilibrium dissociation constants,  $K_D$  values, were obtained from fits to a hyperbolic equation using Excel Solver. Reported  $K_D$  values are the average of at least three independent experiments.

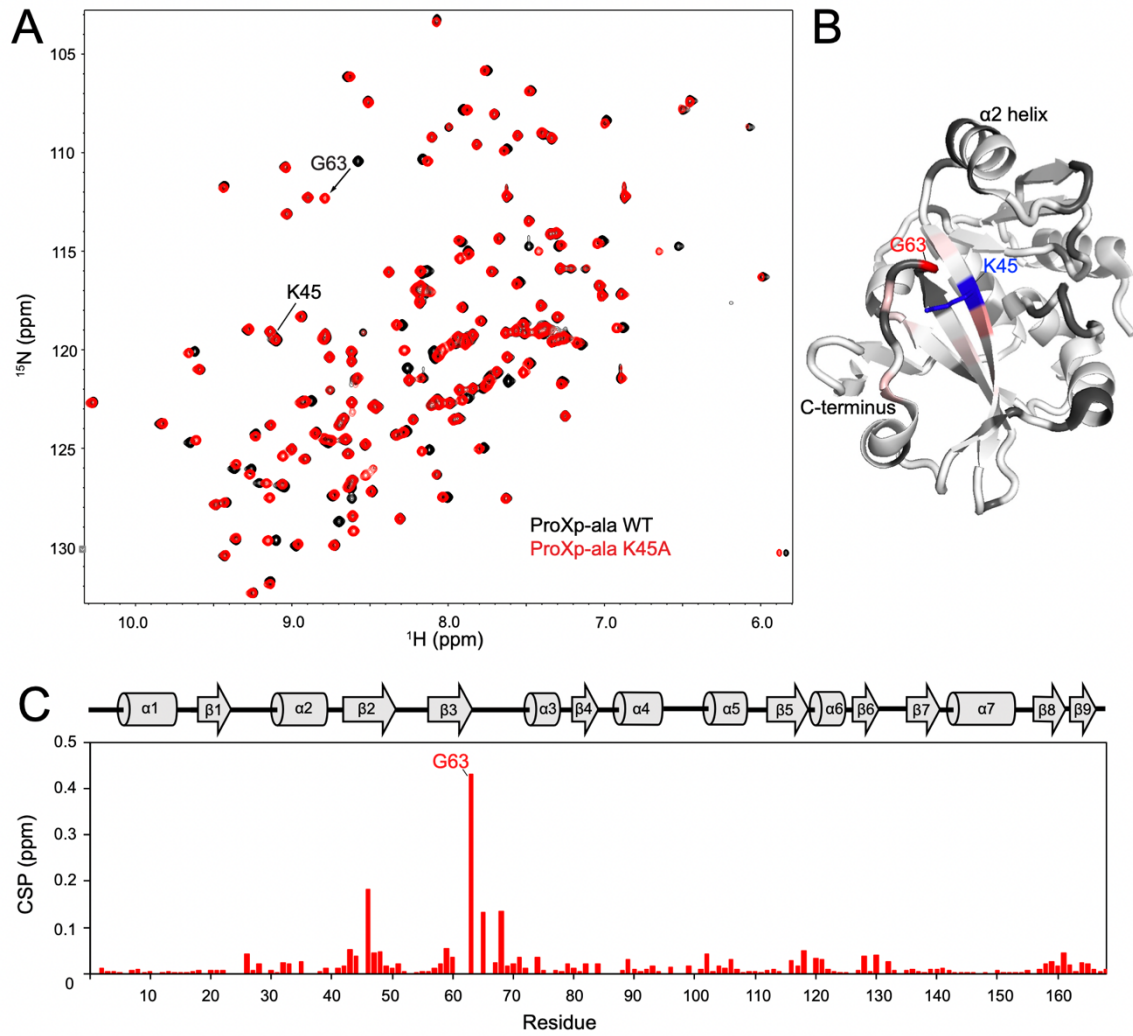

Supplementary Figure S3. NMR spectra show that poor substrate binding by K45A ProXp-ala is not due to a folding defect. (A) Overlaid  $^1\text{H}$ - $^{15}\text{N}$  HSQC spectra of  $[\text{U-}^{15}\text{N}]$ -ProXp-ala WT (black) and K45A variant (red). (B) Chemical shift differences between K45A and WT ProXp-ala mapped with a linear color gradient from white (no CSP) to red (CSP 0.43 ppm) on the crystal structure of *Cc* ProXp-ala (PDB: 5VXB). Unassigned residues are grey. K45 and G63 are labeled blue and red, respectively; (C) Secondary structure of *Cc* ProXp-ala (top) and per residue CSP analysis of K45A ProXp-ala compared to WT ProXp-ala.

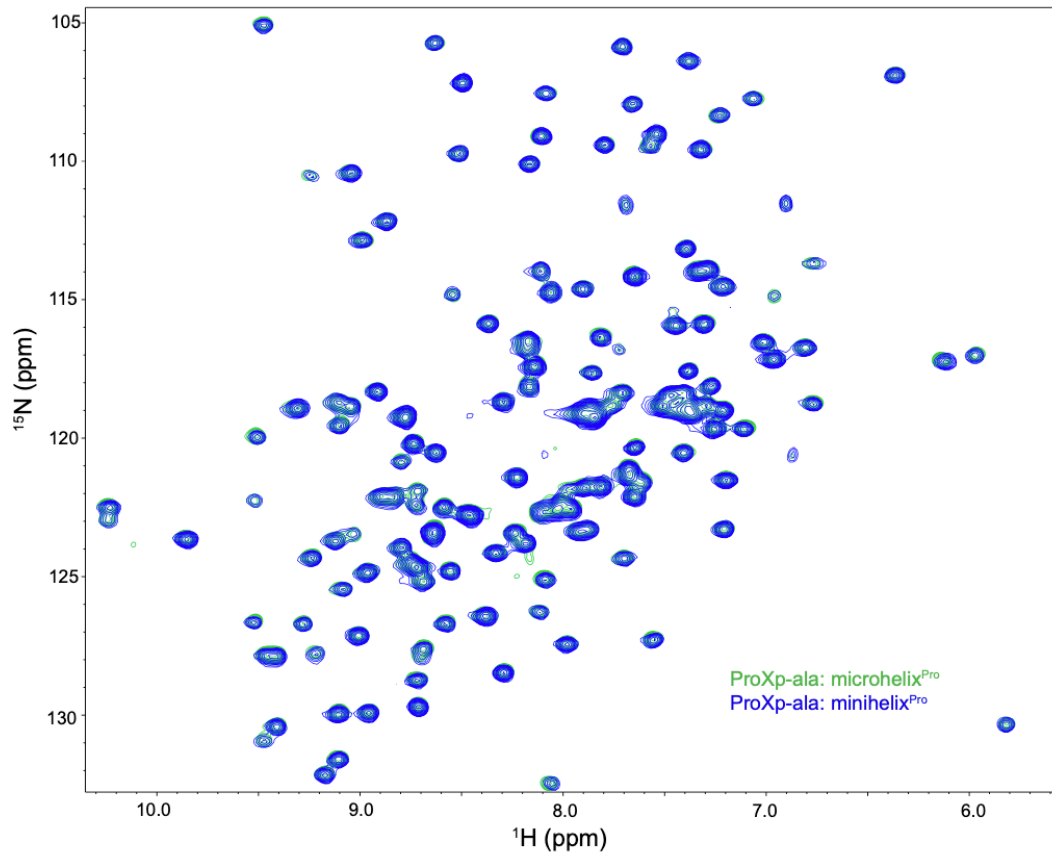

Supplementary Figure S4. Minihelix<sup>Pro</sup> and microhelix<sup>Pro</sup> bind similarly to ProXp-ala. Overlaid  $^1\text{H}$ - $^{15}\text{N}$  HSQC spectra of 100  $\mu\text{M}$  [ $\text{U-}^{15}\text{N}$ ]-ProXp-ala in the presence of 100  $\mu\text{M}$  microhelix<sup>Pro</sup> (green) or minihelix<sup>Pro</sup> (blue). The spectra were recorded at 25  $^\circ\text{C}$ .

Supplementary Table 1. Sequences (shown 5' to 3') of the microhelix and minihelix RNA constructs used in this work.

| RNA Constructs                             | Sequence                            |
|--------------------------------------------|-------------------------------------|
| microhelix <sup>Pro</sup>                  | CGGCGAGUUCGCUCGCCGACCA              |
| G1:C72-microhelix <sup>Pro</sup>           | GGGCGAGUUCGCUCGCCACCA               |
| $\Delta$ A76-microhelix <sup>Pro</sup>     | CGGCGAGUUCGCUCGCCGACC               |
| 3'p $\Delta$ A76-microhelix <sup>Pro</sup> | CGGCGAGUUCGCUCGCCGAC[3'pC]          |
| minihelix <sup>Pro</sup>                   | CGGCGAGGGAGGUUCGAAUCCUCUCUCGCCGACCA |

Supplementary Table 2. Sequences (shown 5' to 3') of the RNA duplex constructs used in this work.

| 5' Fragment      | Sequence               |
|------------------|------------------------|
| 5' fragment      | CGGCGAGGGAGGUU[6FAM]   |
| 3' Fragments     | Sequence               |
| A76 (WT)         | AUCCUCUCUCGCCGACCA     |
| $\Delta$ A76     | AUCCUCUCUCGCCGACC      |
| 3'p $\Delta$ A76 | AUCCUCUCUCGCCGAC[3'pC] |
| A76C             | AUCCUCUCUCGCCGACCC     |
| A76G             | AUCCUCUCUCGCCGACCG     |
| A76U             | AUCCUCUCUCGCCGACCU     |
| dA76             | AUCCUCUCUCGCCGACC[dA]  |

Supplementary Table 3. Results of double-exponential fits of deacylation data in Figures 2 and 3. The  $k_{obs}$  values plotted in Figure 3B were extracted from the fast phase, which on average represented at least 80% of the amplitude.

| Trials | WT ProXp-ala and WT tRNA <sup>Pro</sup>                      |
|--------|--------------------------------------------------------------|
| 1      | $y = 87.3 \times e^{-23.4t} + 13 \times e^{-0.25t} - 0.3$    |
| 2      | $y = 83.5 \times e^{-21.8t} + 14.6 \times e^{-0.35t} + 1.8$  |
| 3      | $y = 82.7 \times e^{-21.6t} + 17.3 \times e^{-0.46t} + 0.04$ |
| Trials | WT ProXp-ala and A73C tRNA <sup>Pro</sup>                    |
| 1      | $y = 92.6 \times e^{-5.4t} + 7.3 \times e^{-0.14t} + 0.2$    |
| 2      | $y = 85.5 \times e^{-6.9t} + 13.2 \times e^{-0.5t} + 1.2$    |
| 3      | $y = 92.1 \times e^{-6.7t} + 7.8 \times e^{-0.36t} + 0.1$    |
| Trials | K50A ProXp-ala and WT tRNA <sup>Pro</sup>                    |
| 1      | $y = 79.2 \times e^{-5.4t} + 20 \times e^{-0.27t} + 0.8$     |
| 2      | $y = 79.9 \times e^{-5.3t} + 19.6 \times e^{-0.27t} + 0.4$   |
| 3      | $y = 82.1 \times e^{-4.6t} + 17.3 \times e^{-0.24t} + 0.6$   |
